# Supplementary material
Source: PubMed Central journal article supplement (PMC7887872)
Supplement: ap0c01070_si_001.pdf [file ap0c01070_si_001.pdf]

## Supporting Information

### Impact of the chemical structure on the dynamics of mass transfer of water in conjugated microporous polymers: A neutron spectroscopy study

Anne A. Y. Guilbert<sup>1\*</sup>, Yang Bai<sup>2</sup>, Catherine M. Aitchison<sup>2</sup>, Reiner Sebastian Sprick<sup>2</sup>, Mohamed Zbiri<sup>3\*</sup>

<sup>1</sup>Department of Physics and Centre for Plastic Electronics, Imperial College London, Prince Consort Road, London SW7 2AZ, U.K.

<sup>2</sup>Department of Chemistry and Materials Innovation Factory, University of Liverpool, Crown Street, Liverpool L69 7ZD, U.K.

<sup>3</sup>Institut Laue-Langevin, 71 Avenue des Martyrs, Grenoble Cedex 9 38042, France

\*a.guilbert09@imperial.ac.uk

\*zbiri@ill.fr

**Table S1. Neutron incoherent cross section (cm<sup>-1</sup>) of the samples studied in this work. The density of the CMPs is taken to be 0.8 g.cm<sup>-3</sup>.**

| water concentration (wt%) | S-CMP3 | S-CMP1 | F-CMP3 | H <sub>2</sub> O | D <sub>2</sub> O |
|---------------------------|--------|--------|--------|------------------|------------------|
| 0                         | 1.328  | 1.242  | 1.944  |                  |                  |
| 100                       |        |        |        | 5.621            | 0.138            |
| 0.16                      | 1.116  |        |        | 0.899            |                  |
| 0.36                      | 0.850  |        |        | 2.024            |                  |
| 0.475                     | 0.697  |        |        | 2.670            |                  |
| 0.48                      | 0.691  |        |        | 2.698            |                  |
| 0.64                      | 0.478  |        |        | 3.597            |                  |
| 0.65                      | 0.465  |        |        | 3.654            |                  |
| 0.685                     | 0.418  |        |        | 3.850            |                  |
| 0.33                      | 0.890  |        |        |                  | 0.046            |
| 0.48                      | 0.691  |        |        |                  | 0.066            |
| 0.67                      | 0.438  |        |        |                  | 0.092            |
| 0.22                      |        |        | 1.516  | 1.237            |                  |
| 0.32                      |        |        | 1.322  | 1.799            |                  |
| 0.40                      |        |        | 1.166  | 2.248            |                  |
| 0.55                      |        |        | 0.875  | 3.092            |                  |
| 0.64                      |        |        | 0.700  | 3.597            |                  |
| 0.40                      |        | 0.451  |        | 3.710            |                  |

**Table S2. Bessel function contributions to the dynamical structure factor of rotational motions of H<sub>2</sub>O.**

| Q (Å <sup>-1</sup> ) | $j_0^2(Qa)$ | $3j_1^2(Qa)$ | $5j_2^2(Qa)$ |
|----------------------|-------------|--------------|--------------|
| 0.5                  | 0.89        | 0.17         | 0.00         |
| 0.8                  | 0.73        | 0.39         | 0.03         |
| 1.1                  | 0.53        | 0.65         | 0.09         |
| 1.4                  | 0.34        | 0.86         | 0.20         |
| 1.7                  | 0.17        | 0.99         | 0.37         |

**Table S3. Fitting parameters for H<sub>2</sub>O and D<sub>2</sub>O.**

|                  |      | 0.5 Å <sup>-1</sup> | 0.8 Å <sup>-1</sup> | 1.1 Å <sup>-1</sup> | 1.4 Å <sup>-1</sup> | 1.7 Å <sup>-1</sup> |
|------------------|------|---------------------|---------------------|---------------------|---------------------|---------------------|
| H <sub>2</sub> O | A(Q) | 0.016               | 0.017               | 0.017               | 0.017               | 0.017               |
|                  | B(Q) | 0.097               | 0.069               | 0.057               | 0.037               | 0.043               |
| D <sub>2</sub> O | A(Q) | 0.014               | 0.016               | 0.017               | 0.018               |                     |
|                  | B(Q) | 0.119               | 0.091               | 0.062               | 0.015               |                     |

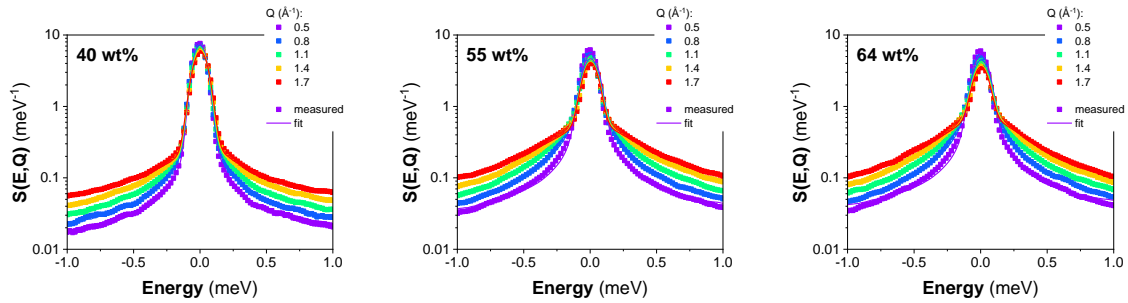

Figure S1. Measured (scatter points), and associated fit (solid line), room temperature Q-dependent QENS spectra of F-CMP3 mixed with different concentrations of H<sub>2</sub>O.

**Table S4. Fitting parameters for F-CMP3 mixed with different concentrations of H<sub>2</sub>O.**

|        | $\chi^2$ | B(Q)                |                     |                     |                     |                     |
|--------|----------|---------------------|---------------------|---------------------|---------------------|---------------------|
|        |          | 0.5 Å <sup>-1</sup> | 0.8 Å <sup>-1</sup> | 1.1 Å <sup>-1</sup> | 1.4 Å <sup>-1</sup> | 1.7 Å <sup>-1</sup> |
| 40 wt% | 4.22     | 0.006               | 0.004               | 0.002               | 0.000               | 0.000               |
| 55 wt% | 4.69     | 0.025               | 0.019               | 0.015               | 0.006               | 0.006               |
| 64 wt% | 2.74     | 0.031               | 0.023               | 0.017               | 0.005               | 0.001               |

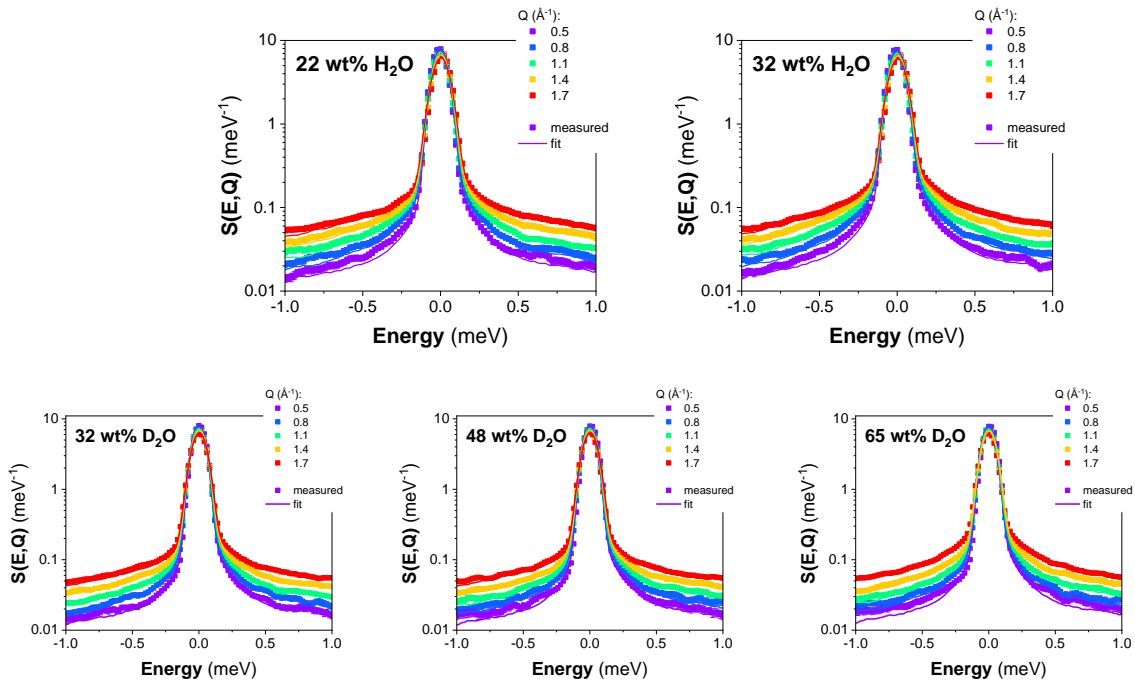

Figure S2. Measured (scatter points), and associated fit (solid lines) using the average model, room temperature Q-dependent QENS spectra of F-CMP3:H<sub>2</sub>O at 22 wt% and 32 wt% of H<sub>2</sub>O, and F-CMP3:D<sub>2</sub>O at 32 wt%, 48 wt% and 65 wt% of D<sub>2</sub>O.

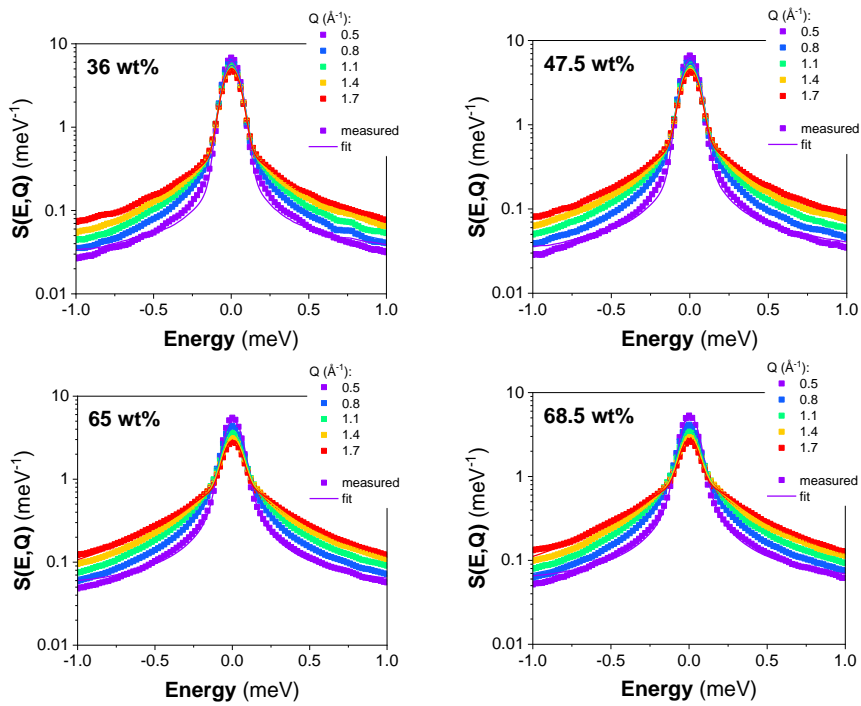

Figure S3. Measured (scatter points), and associated fit (solid line), room temperature Q-dependent QENS spectra of S-CMP3:H<sub>2</sub>O with different concentrations of H<sub>2</sub>O.

**Table S5. Fitting parameters for S-CMP3 mixed with different concentrations of H<sub>2</sub>O.**

|                 | $\chi^2$ | B(Q)                |                     |                     |                     |                     |
|-----------------|----------|---------------------|---------------------|---------------------|---------------------|---------------------|
|                 |          | 0.5 Å <sup>-1</sup> | 0.8 Å <sup>-1</sup> | 1.1 Å <sup>-1</sup> | 1.4 Å <sup>-1</sup> | 1.7 Å <sup>-1</sup> |
| <b>36 wt%</b>   | 0.85     | 0.019               | 0.014               | 0.011               | 0.003               | 0.000               |
| <b>47.5 wt%</b> | 0.81     | 0.023               | 0.018               | 0.014               | 0.005               | 0.000               |
| <b>65 wt%</b>   | 2.57     | 0.047               | 0.035               | 0.026               | 0.012               | 0.006               |
| <b>68.5 wt%</b> | 1.58     | 0.053               | 0.038               | 0.028               | 0.012               | 0.007               |

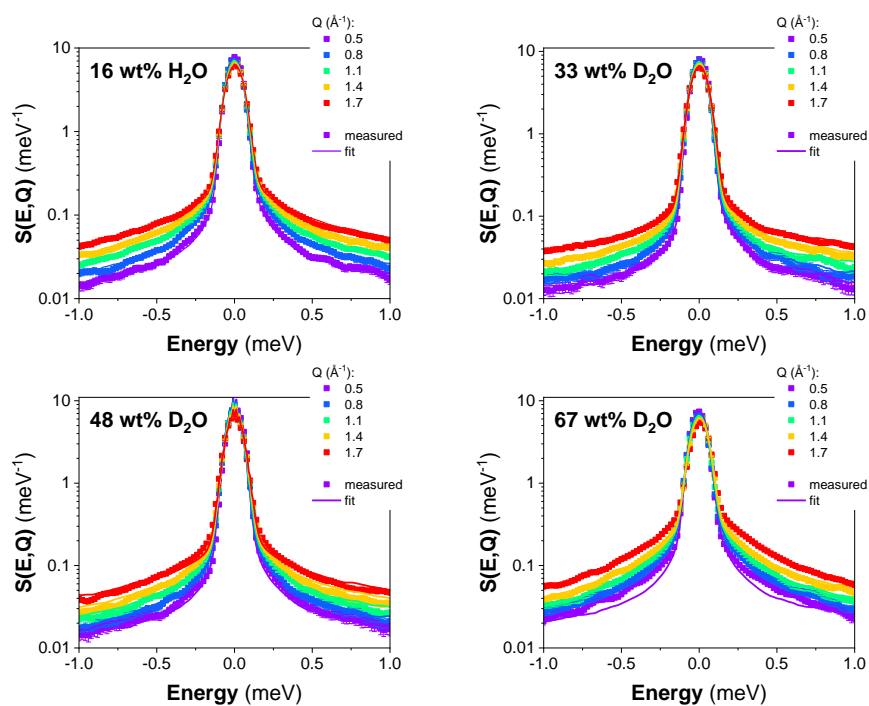

Figure S4. Q-dependent QENS spectra (scatter points) and fit using the average model (solid line) of S-CMP3 mixed at 16 wt% of H<sub>2</sub>O, and at 33 wt%, 48 wt% and 67 wt% of D<sub>2</sub>O.

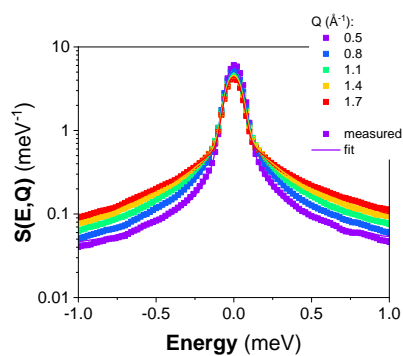

Figure S5. Q-dependent QENS spectra (scatter points) and fit (solid line) of S-CMP1:H<sub>2</sub>O (30 wt% of H<sub>2</sub>O).

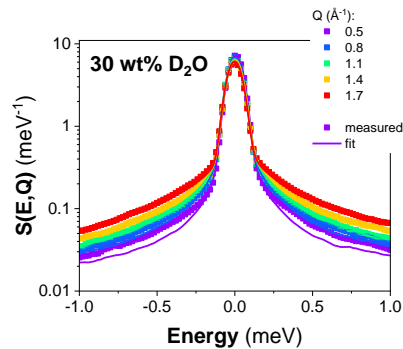

Figure S6. Q-dependent QENS spectra (scatter points) and fit using the average model (solid line) of S-CMP1:D<sub>2</sub>O (30 wt% of D<sub>2</sub>O).

Table S6. Fitting parameters for S-CMP1:H<sub>2</sub>O (30 wt% of H<sub>2</sub>O)

|        | $\chi^2$ | B(Q)                |                     |                     |                     |                     |
|--------|----------|---------------------|---------------------|---------------------|---------------------|---------------------|
|        |          | 0.5 Å <sup>-1</sup> | 0.8 Å <sup>-1</sup> | 1.1 Å <sup>-1</sup> | 1.4 Å <sup>-1</sup> | 1.7 Å <sup>-1</sup> |
| 30 wt% | 1.02     | 0.030               | 0.023               | 0.018               | 0.010               | 0.001               |

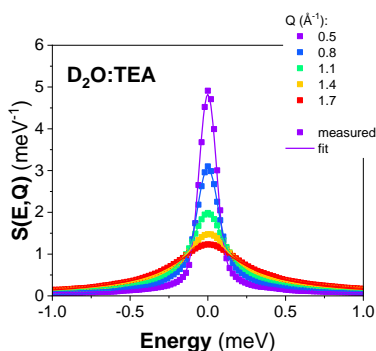

Figure S7. Q-dependent QENS spectra (scatter points) and fit (solid line) of the mixture of solvents D<sub>2</sub>O:TEA.

Table S7. Fitting parameters for D<sub>2</sub>O:TEA -  $\chi^2=0.58$

|      | 0.5 Å <sup>-1</sup> | 0.8 Å <sup>-1</sup> | 1.1 Å <sup>-1</sup> | 1.4 Å <sup>-1</sup> | 1.7 Å <sup>-1</sup> |
|------|---------------------|---------------------|---------------------|---------------------|---------------------|
| A(Q) | 0.017               | 0.017               | 0.016               | 0.016               | 0.017               |
| B(Q) | 0.062               | 0.065               | 0.059               | 0.039               | 0.010               |

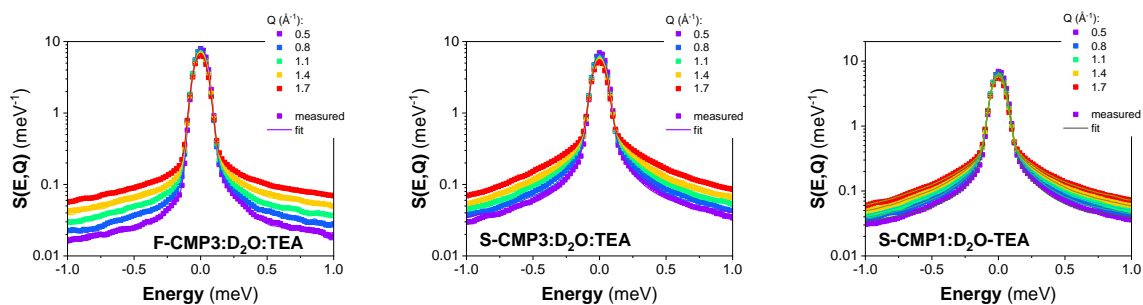

Figure S8. Q-dependent QENS spectra (scatter points) and fit (solid line) of F-CMP3:D<sub>2</sub>O:TEA (left), S-CMP3:D<sub>2</sub>O:TEA (middle), and S-CMP1:D<sub>2</sub>O:TEA (right).

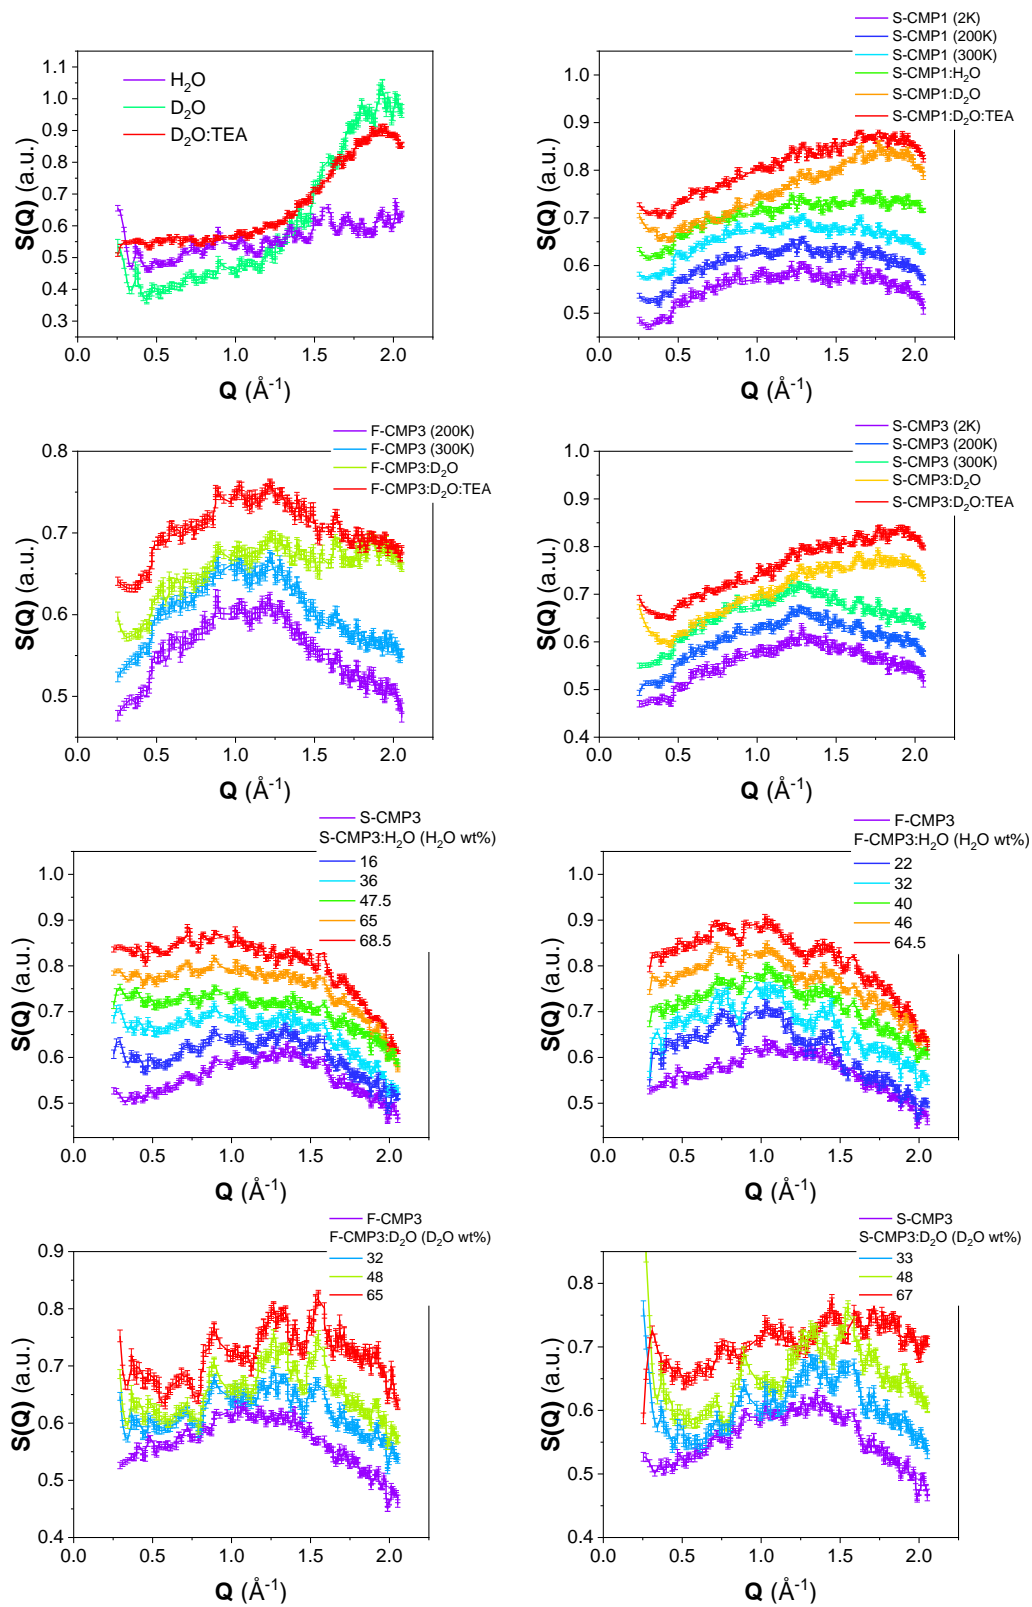

Figure S9. Neutron diffractograms of the studied CMP materials, solvents and their mixtures, from the IN6 measurements.

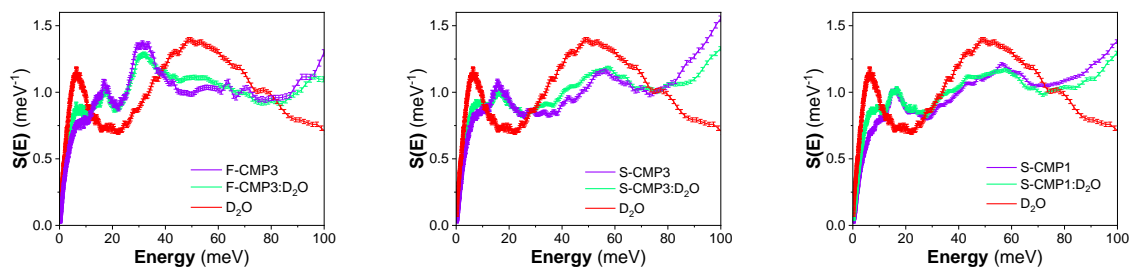

Figure S10. Room temperature generalised density of states (GDOS) of F-CMP3 (left), S-CMP3 (middle) and S-CMP1 (right), bulk D<sub>2</sub>O and associated mixture (top).

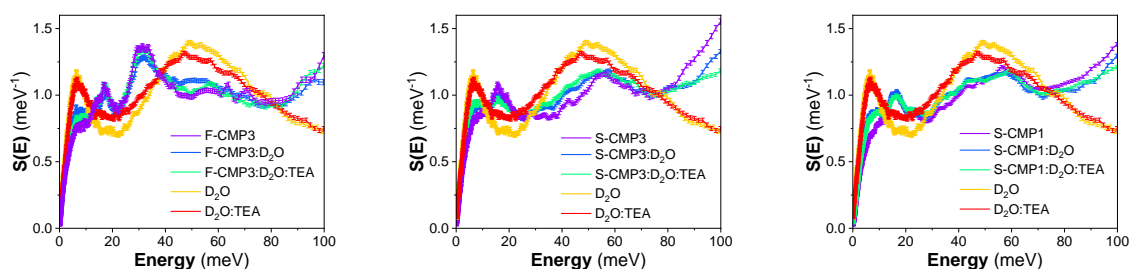

Figure S11. Room temperature generalised density of states (GDOS) of F-CMP3, solvents and associated mixtures (left), S-CMP3, solvents and associated mixtures (middle), and S-CMP1, solvents and associated mixtures (right).

**Table S8. Mode frequencies and associated assignments of the CH<sub>2</sub> and SO<sub>2</sub> groups from our DFT-based single-molecule calculations. These modes couple with the vibrational degree-of-freedom of benzene.<sup>1</sup> The calculated frequencies have been scaled by a factor of 0.97 to better match the measurements.**

|                       | Freq (cm <sup>-1</sup> ) | mode                            |
|-----------------------|--------------------------|---------------------------------|
| <b>CH<sub>2</sub></b> | 230.569                  | rocking + out of plane backbone |
|                       | 243.6155                 | motions                         |
|                       | 693.7828                 | rocking+E2u                     |
|                       | 714.793                  | wagging+E2g                     |
|                       | 741.1382                 | twisting+E2u                    |
|                       | 762.4394                 | E2g                             |
|                       | 796.3894                 | rocking+A2u                     |
|                       | 815.8185                 | twisting+A2u                    |
|                       | 853.2993                 | rocking+B2g                     |
|                       | 869.411                  | twisting+B2g                    |
| <b>SO<sub>2</sub></b> | 652.3929                 | scissor+E2g                     |
|                       | 676.3228                 | E2u                             |
|                       | 683.1613                 | wagging+E2g                     |
|                       | 693.6567                 | E2u                             |
|                       | 703.3761                 | scissor+E2g                     |
|                       | 803.6062                 | A2u                             |
|                       | 810.5417                 | A2u                             |
|                       | 846.6839                 | wagging+E2g                     |
|                       | 851.4369                 | E1g                             |
|                       | 851.757                  | symmetric stretch+E2g           |

## REFERENCES

- (1) Preuss, M.; Bechstedt, F. Vibrational Spectra of Ammonia, Benzene, and Benzene Adsorbed on Si (001) by First Principles Calculations with Periodic Boundary Conditions. *Physical Review B - Condensed Matter and Materials Physics* **2006**, *73* (15), 155413. <https://doi.org/10.1103/PhysRevB.73.155413>.
